# Supplementary material
Source: PubMed Central journal article supplement (PMC2936636)
Supplement: 1007879107_pnas.201007879SI.pdf [file 1007879107_pnas.201007879SI.pdf]

# Supporting Information

Kline et al. 10.1073/pnas.1007879107

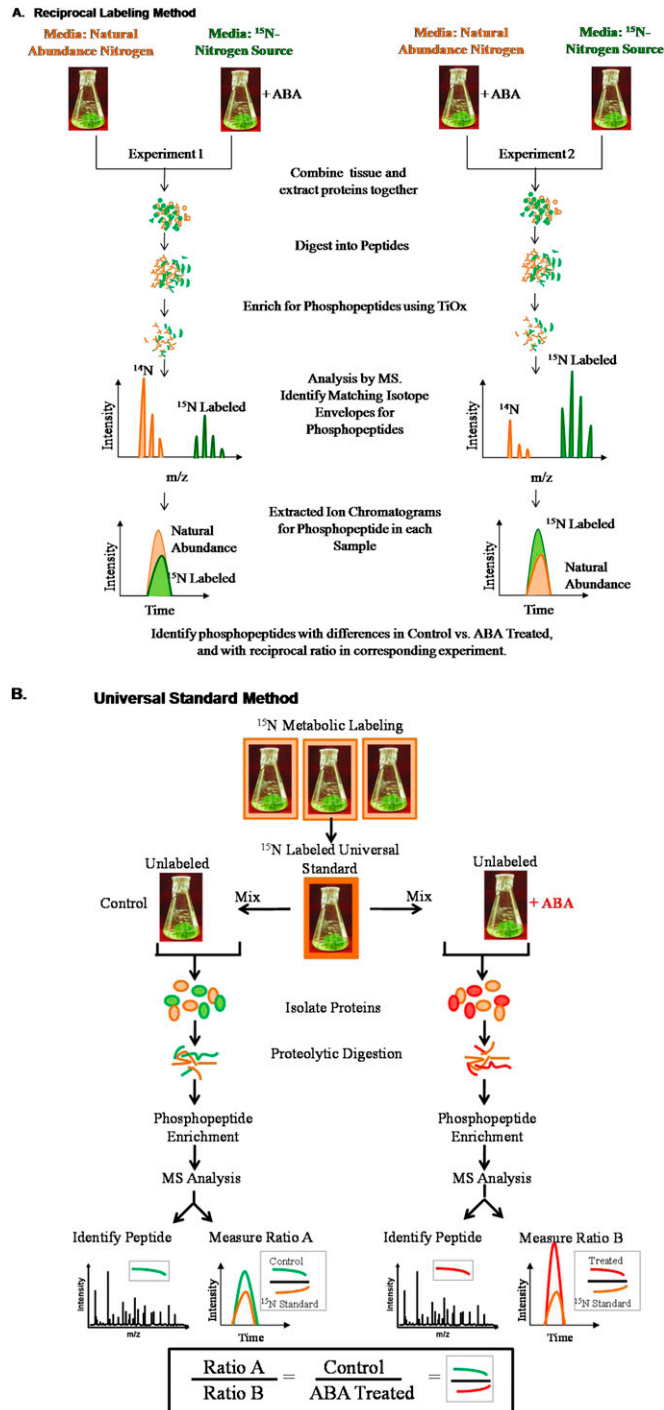

**Fig. S1.** Overview of the two *Arabidopsis* metabolic-labeling methods used. (A) Reciprocal-labeling method. In experiment one, the control plant is grown in natural-abundance medium, and the plant grown in  $^{15}\text{N}$  isotope-enriched medium is treated with abscisic acid (ABA). In experiment two, the treatment and isotopic label are exchanged to create the reciprocal experimental set. Tissue samples are combined, and, after protein extraction, digestion, phosphopeptide enrichment, and MS analysis, the relative phosphopeptide abundances can be determined from the ratio of the extracted ion chromatograms of the natural-abundance peptide and  $^{15}\text{N}$ -labeled peptide. Phosphorylation changes resulting from experimental treatment show reciprocal ratios in experiment one and experiment two, whereas changes caused by isotope effects show constant ratios in the two experimental groups. (B) Universal standard method. Experimental plants are grown in natural-abundance medium, and universal standard plants are grown in  $^{15}\text{N}$  isotope-enriched medium. All unlabeled experimental tissue samples are combined at a 1:1 (weight:weight) ratio with the pooled  $^{15}\text{N}$ -labeled universal standard tissue. After protein extraction, digestion, phosphopeptide enrichment, and MS analysis, the relative phosphopeptide abundances can be determined by the fractional change between the control and ABA-treated samples, as calculated by the ratio of two ratios. With this method data are acquired for one biological replicate per time point.

**Table S1. Significantly altered phosphopeptides in response to ABA treatment (50  $\mu$ M for 5, 15, or 30 min)**

| ATG accession | Protein                                             | Phosphopeptide                                                                                                          | Average phosphorylation change with ABA |                 |                    |
|---------------|-----------------------------------------------------|-------------------------------------------------------------------------------------------------------------------------|-----------------------------------------|-----------------|--------------------|
|               |                                                     |                                                                                                                         | 5 min                                   | 15 min          | 30 min             |
| Other targets |                                                     |                                                                                                                         |                                         |                 |                    |
| AT1G43910     | AAA-type ATPase family protein                      | K.GEDS* <b>S</b> VEEEGEIEDAETK.E                                                                                        | N/a                                     | N/a             | Decrease (284%)    |
| AT5G60980     | Nuclear transport factor 2 (NTF2)                   | R.VVVSHEPEVEPEPVASIEEEDLDNVAEVYDPS* <b>D</b> K.D                                                                        | N/a                                     | N/a             | Decrease (57%)     |
| AT5G22010     | Replication factor C 1 (ATRFC1)                     | R.DEDGEPLADNEEGNGS* <b>D</b> AEEDESEEATDGEK.L                                                                           | N/a                                     | N/a             | Decrease (68%)     |
| AT1G14170     | KM domain-containing protein                        | K.VHDMVVADADQDDGT* <b>D</b> DDNDLGEK.Q                                                                                  | Decrease (37%)                          | Decrease (24%)  | Decrease (72%)     |
| AT3G60240     | Eukaryotic translation initiation factor 4G (EIF4G) | R.RPAGGLNGFGS* <b>H</b> RPASPVTHGR.S                                                                                    | N/a                                     | N/a             | Decrease (75%)     |
| AT4G28080     | Binding protein                                     | K.LVKPEATVHEDDSS* <b>D</b> EGWQEA <del>V</del> PK.N                                                                     | Decrease (75%)                          | No change       | Decrease (78%)     |
| AT2G38280     | Embryonic factor1 (FAC1)                            | R.SHS* <b>V</b> SGDLHGVPDPIAADILR.K                                                                                     | N/a                                     | N/a             | Decrease (99%)     |
| AT2G26110     | Unknown protein                                     | K. <b>S</b> *INFSSTSPDK.S                                                                                               | N/a                                     | N/a             | Decrease (36%) EDT |
| AT4G27500     | Proton pump interactor 1 (PPI1)                     | K.KTGGNTETETEVEPEAS* <b>E</b> EEIEAPVQEEKPK.E                                                                           | Decrease (59%)                          | No change       | N/a                |
| AT1G06190     | ATP-binding ATPase                                  | K.KAELVELLGS <b>S</b> * <b>S</b> .-                                                                                     | Decrease (96%)                          | No change       | No change          |
| AT1G06190     | ATP-binding ATPase                                  | K.AELVELLGS <b>S</b> * <b>S</b> .-                                                                                      | Decrease (108%)                         | No change       | N/a                |
| AT5G46750     | ARF-GAP domain 9 (AGD9)                             | K.ESSLKQEA <b>A</b> VV <b>S</b> * <b>P</b> K.A                                                                          | N/a                                     | N/a             | Increase (28%)     |
| AT3G18390     | Embryo defective-1865 (EMB1865)                     | R.NLGLGS* <b>D</b> EDDDVEDDEGGINGGDV <b>K</b> PVTGEER.L                                                                 | Decrease (117%)                         | No change       | Increase (28%)     |
| AT3G06550     | Unknown: CAS1P-like                                 | K.ALLIEDGGGLQS <b>A</b> S* <b>P</b> R.A                                                                                 | Decrease (26%)                          | No change       | Increase (29%)     |
| AT3G22850     | Unknown protein                                     | R.VDSSGEVCGVTFK.V                                                                                                       | Increase (8%)                           | Increase (18%)  | Increase (52%)     |
| AT1G59610     | Arabidopsis dynamin-like 3 (ADL3)                   | R.AAAASSWSDNSGTESS* <b>P</b> R.T                                                                                        | Increase (129%)                         | Increase (32%)  | Increase (80%)     |
| AT5G20650     | Copper ion transmembrane transporter(COPT5)         | R.SSS* <b>G</b> V <b>S</b> APLIPK.S                                                                                     | Increase (38%)                          | No change       | Increase (81%)     |
| AT2G32240     | Unknown protein                                     | R.DIDL <b>S</b> FS <b>S</b> * <b>P</b> T <b>K</b> .R                                                                    | Increase (60%)                          | Increase (77%)  | Increase (98%)     |
| AT5G42950     | GYF domain-containing protein                       | K.DIQGSDNA <b>I</b> PL <b>S</b> * <b>P</b> QWLLSKPGENK.T                                                                | Increase (83%)                          | No change       | N/a                |
| AT1G03060     | WD-40 repeat family protein                         | K.HINDADDSGS <b>Q</b> GLPHDQDQSTK.T                                                                                     | N/a                                     | Increase (104%) | N/a                |
| AT1G73980     | Phosphoribulokinase                                 | K.LSLDDDT <b>V</b> SS* <b>P</b> K.E                                                                                     | Increase (49%)                          | Increase (74%)  | N/a                |
| AT5G35980     | Protein kinase family protein                       | K.TV <b>Y</b> S <b>Y</b> * <b>I</b> QSR.Y                                                                               | Increase (481%)                         | N/a             | N/a                |
| AT1G59870     | Penetration-3 ATPase (PEN3)                         | R.NIEDIFSSGS* <b>R</b> .R                                                                                               | Increase (51%)                          | N/a             | N/a                |
| AT2G14835     | Zinc finger family protein                          | R.QNS* <b>E</b> T <b>L</b> Y <b>A</b> DD <b>E</b> DG <b>N</b> R.K                                                       | Increase (36%)                          | N/a             | N/a                |
| AT4G13510     | Ammonium transporter 1-1 (AMT1-1)                   | R. <b>S</b> * <b>P</b> SPSGANTTTPV.-                                                                                    | Increase (80%)                          | N/a             | N/a                |
| AT4G37040     | Methionine aminopeptidase 1D (MAP1D)                | R.T <b>F</b> S* <b>G</b> L <b>T</b> DL <b>L</b> FN <b>R</b> .R                                                          | N/a                                     | Increase (155%) | N/a                |
| AT4G24520     | Arabidopsis P450 reductase 1 (ATR1)                 | K. <b>S</b> * <b>M</b> ES <b>N</b> V <b>A</b> NG <b>N</b> TT <b>I</b> D <b>H</b> HP <b>C</b> R.V                        | Increase (40%)                          | Increase (53%)  | No change          |
| AT2G46820     | Photosystem I P subunit (PSI-P)                     | R.A <b>T</b> 7 <b>V</b> EG <b>E</b> AP <b>A</b> TT <b>T</b> EA <b>E</b> TT <b>E</b> L <b>P</b> E <b>I</b> V <b>K</b> .T | Increase (48%)                          | Increase (34%)  | No change          |

Phosphorylated amino acids are in bold followed by (\*) as determined from manual inspection and validation of MS<sup>2</sup> spectra. When assignment could not be determined conclusively from the MS<sup>2</sup> spectra, all possible sites of phosphorylation are denoted by italics. Phosphorylation changes are presented as the average percent change of the treated sample relative to control with three technical replicates each, with significance ( $P < 0.05$ ) as determined by two-tailed  $t$  test. Unless otherwise denoted, identifications were made by collision-induced dissociation fragmentation. EDT, electron transfer dissociation; N/a, not applicable.

**Table S2. Proteins whose level of phosphorylation was significantly altered in response to calyculin-A treatment (100 nM, 30 min)**

| ATG accession | Protein                                                               | Phosphopeptide                   | Average phosphorylation change with calyculin (30 min) |
|---------------|-----------------------------------------------------------------------|----------------------------------|--------------------------------------------------------|
| AT1G59870     | Penetration 3 (PEN3)                                                  | R.NIEDIFSSGS*R.R                 | Increase (1,270%)                                      |
| AT4G30160     | <i>Arabidopsis thaliana</i> villin 4 (VLN4)                           | R.NLS*TPPPVVR.K                  | Increase (386%)                                        |
| AT4G39260     | GR-RBP8                                                               | R.EGGGYGGGDGGS*YGGGGGGW.-        | Increase (348%)                                        |
| AT4G35230     | BR-signaling kinase 1 (BSK1)                                          | K.S*YSTNLAYTPPEYLR.N             | Increase (194%)                                        |
| AT1G22300     | General regulatory factor 10 (GRF10)                                  | R.DNLTWTSDLNEEGDERT*KGADEPQDEN.- | Increase (158%)                                        |
| AT3G57530     | Calcium-dependent protein kinase 32 (CPK32)                           | R.EGFQIMDTS*QR.G                 | Increase (126%)                                        |
| AT5G08080     | Syntaxin of plants 132 (SYP132)                                       | R.GQS*SREGDVELGEQQGGDQGLEDFFK.K  | Increase (120%)                                        |
| AT2G38940     | <i>Arabidopsis thaliana</i> phosphate transporter 2 (ATPT2)           | K.SLEEM#SGENEDNENS*NNSDR.T       | Increase (59%)                                         |
| AT2G32240     | Unknown protein                                                       | R.DIDLSFSS*PTK.R                 | Increase (50%)                                         |
| AT3G05000     | Transport protein particle (TRAPP)                                    | R.VSIDPSENETQDPST*PGESK.A        | Increase (48%)                                         |
| AT5G42950     | GYF domain-containing protein                                         | K.DIQGSDNAIPLS*PQWLLSKPGENK.T    | Increase (43%)                                         |
| AT5G61210     | Soluble n-ethylmaleimide-sensitive factor adaptor protein 33 (SNAP33) | R.TT*SEPSLADMTNPFGGGER.V         | Increase (42%)                                         |
| AT1G59610     | <i>Arabidopsis</i> dynamin-like 3 (ADL3)                              | R.AAAASSWSDNSGTESS*PR.T          | Increase (39%)                                         |
| AT3G53180     | Catalytic/glutamate-ammonia ligase                                    | K.LNIDTDSSS*PQNIISPK.L           | Increase (28%)                                         |
| AT2G38280     | Embryonic factor1 (FAC1)                                              | R.SHS*VSGDLHGVQPDPIAADILR.K      | Increase (26%)                                         |
| AT5G57330     | Aldose 1-epimerase family protein                                     | K.GRLELSAVPSSYSS*GQLDPK.K        | Increase (23%)                                         |
| AT3G53180     | Catalytic/glutamate-ammonia ligase                                    | K.LNIDTDSSSPQNIIS*PK.L           | Increase (20%)                                         |
| AT2G45200     | Golgi snare 12 (GOS12)                                                | R.FTQGGYVDT*GSPTVGSGR.S          | Increase (14%)                                         |
| AT3G02880     | Leucine-rich repeat transmembrane protein kinase                      | R.LIEEVSHSSGS*PNPVSD.-           | Increase (6%)                                          |

Phosphorylated amino acids are in bold followed by (\*) as determined from manual inspection and validation of MS<sup>2</sup> spectra. When assignment could not be conclusively determined from the MS<sup>2</sup> spectra, all possible sites of phosphorylation are denoted by italics. Oxidation of methionine is indicated by (#). Phosphorylation changes are presented as the average percent change of the treated sample relative to control in the two reciprocal experiments with three technical replicates each.
